# Supplementary material
Source: PubMed Central journal article supplement (PMC7430728)
Supplement: 7405205030p1_ds001.pdf [file 7405205030p1_ds001.pdf]

**Supplemental Figure 1. Goal-planning worksheets.**

Adapted from “A New Approach to Group Visits: Helping High-Need Patients Make Behavioral Change,” by J. Antonucci, 2008, *Family Practice Management*, 15(4), A6. Copyright © 2003-2019 FNX Corporation and Trustees of Dartmouth College.

# Goal-Planning Worksheet

ID # for study: D3

|                                                                                                                                                                                                                                                                                                                                                                                                                                                                                                                                                                                                                                                                                                                       |                                                                                                                                                   |                                                                                                                                     |        |   |                    |   |       |   |                     |    |   |   |    |                     |  |  |        |  |                    |  |       |  |                     |  |
|-----------------------------------------------------------------------------------------------------------------------------------------------------------------------------------------------------------------------------------------------------------------------------------------------------------------------------------------------------------------------------------------------------------------------------------------------------------------------------------------------------------------------------------------------------------------------------------------------------------------------------------------------------------------------------------------------------------------------|---------------------------------------------------------------------------------------------------------------------------------------------------|-------------------------------------------------------------------------------------------------------------------------------------|--------|---|--------------------|---|-------|---|---------------------|----|---|---|----|---------------------|--|--|--------|--|--------------------|--|-------|--|---------------------|--|
| <b>1. Problem:</b> Feels down at times                                                                                                                                                                                                                                                                                                                                                                                                                                                                                                                                                                                                                                                                                |                                                                                                                                                   |                                                                                                                                     |        |   |                    |   |       |   |                     |    |   |   |    |                     |  |  |        |  |                    |  |       |  |                     |  |
| <b>2. Achievable goal:</b> Create schedule of activities inside and outside of the house that even out emotions                                                                                                                                                                                                                                                                                                                                                                                                                                                                                                                                                                                                       |                                                                                                                                                   |                                                                                                                                     |        |   |                    |   |       |   |                     |    |   |   |    |                     |  |  |        |  |                    |  |       |  |                     |  |
| <table style="width: 100%; border-collapse: collapse;"> <tr> <td style="text-align: center;">0</td> <td style="text-align: center;">1</td> <td style="text-align: center;">2</td> <td style="text-align: center;">3</td> <td style="text-align: center;">4</td> <td style="text-align: center;">5</td> <td style="text-align: center;">6</td> <td style="text-align: center;">7</td> <td style="text-align: center;">8</td> <td style="text-align: center;">9</td> <td style="text-align: center;">10</td> </tr> <tr> <td colspan="3">Totally unconvicted</td> <td colspan="2">Unsure</td> <td colspan="2">Somewhat convinced</td> <td colspan="2">A lot</td> <td colspan="2">Extremely convinced</td> </tr> </table> |                                                                                                                                                   |                                                                                                                                     | 0      | 1 | 2                  | 3 | 4     | 5 | 6                   | 7  | 8 | 9 | 10 | Totally unconvicted |  |  | Unsure |  | Somewhat convinced |  | A lot |  | Extremely convinced |  |
| 0                                                                                                                                                                                                                                                                                                                                                                                                                                                                                                                                                                                                                                                                                                                     | 1                                                                                                                                                 | 2                                                                                                                                   | 3      | 4 | 5                  | 6 | 7     | 8 | 9                   | 10 |   |   |    |                     |  |  |        |  |                    |  |       |  |                     |  |
| Totally unconvicted                                                                                                                                                                                                                                                                                                                                                                                                                                                                                                                                                                                                                                                                                                   |                                                                                                                                                   |                                                                                                                                     | Unsure |   | Somewhat convinced |   | A lot |   | Extremely convinced |    |   |   |    |                     |  |  |        |  |                    |  |       |  |                     |  |
| <b>3. How convinced are you that this is the right goal for you?</b>                                                                                                                                                                                                                                                                                                                                                                                                                                                                                                                                                                                                                                                  |                                                                                                                                                   |                                                                                                                                     |        |   |                    |   |       |   |                     |    |   |   |    |                     |  |  |        |  |                    |  |       |  |                     |  |
| <b>4. Solutions:</b><br><i>1) Identify activities outside of the house</i><br><i>2) Identify activities inside of the house</i><br><i>3) Create schedule</i>                                                                                                                                                                                                                                                                                                                                                                                                                                                                                                                                                          |                                                                                                                                                   |                                                                                                                                     |        |   |                    |   |       |   |                     |    |   |   |    |                     |  |  |        |  |                    |  |       |  |                     |  |
| <b>5. Steps for Solution 1:</b><br><i>1) Volunteer</i><br><i>2) Senior Activity Center</i><br><i>3) Exercise</i><br><i>4) Church</i>                                                                                                                                                                                                                                                                                                                                                                                                                                                                                                                                                                                  | <b>Steps for Solution 2:</b><br><i>1) Plants</i><br><i>2) Take care of special items, crystals</i><br><i>3) Cook</i><br><i>4) Maybe get a dog</i> | <b>Steps for Solution 3:</b><br><i>1) Combining activities</i><br><i>2) Pacing</i><br><i>3) Problem-solving schedule that works</i> |        |   |                    |   |       |   |                     |    |   |   |    |                     |  |  |        |  |                    |  |       |  |                     |  |

|                                                                                                                                                                                                                                                                                                                                                                                                                                                                                                                                                                                                                                                                                                                                                                                                                                                                                                                                                                                                                                                                                                                                                                                                                                                                                                                                                                                   |                                                                                                                                      |                                                                                                                                |        |   |                       |   |       |   |   |                        |   |   |    |                        |  |  |        |  |                       |  |       |  |  |                        |
|-----------------------------------------------------------------------------------------------------------------------------------------------------------------------------------------------------------------------------------------------------------------------------------------------------------------------------------------------------------------------------------------------------------------------------------------------------------------------------------------------------------------------------------------------------------------------------------------------------------------------------------------------------------------------------------------------------------------------------------------------------------------------------------------------------------------------------------------------------------------------------------------------------------------------------------------------------------------------------------------------------------------------------------------------------------------------------------------------------------------------------------------------------------------------------------------------------------------------------------------------------------------------------------------------------------------------------------------------------------------------------------|--------------------------------------------------------------------------------------------------------------------------------------|--------------------------------------------------------------------------------------------------------------------------------|--------|---|-----------------------|---|-------|---|---|------------------------|---|---|----|------------------------|--|--|--------|--|-----------------------|--|-------|--|--|------------------------|
| <b>6. Problem:</b> Not safe in kitchen and bathroom                                                                                                                                                                                                                                                                                                                                                                                                                                                                                                                                                                                                                                                                                                                                                                                                                                                                                                                                                                                                                                                                                                                                                                                                                                                                                                                               |                                                                                                                                      |                                                                                                                                |        |   |                       |   |       |   |   |                        |   |   |    |                        |  |  |        |  |                       |  |       |  |  |                        |
| <b>7. Achievable goal:</b> Put in place behavior changes and adaptive equipment that enhance daily safety                                                                                                                                                                                                                                                                                                                                                                                                                                                                                                                                                                                                                                                                                                                                                                                                                                                                                                                                                                                                                                                                                                                                                                                                                                                                         |                                                                                                                                      |                                                                                                                                |        |   |                       |   |       |   |   |                        |   |   |    |                        |  |  |        |  |                       |  |       |  |  |                        |
| <table style="width: 100%; border-collapse: collapse;"> <tr> <td style="border-bottom: 1px solid black; width: 10%; text-align: center;">0</td> <td style="border-bottom: 1px solid black; width: 10%; text-align: center;">1</td> <td style="border-bottom: 1px solid black; width: 10%; text-align: center;">2</td> <td style="border-bottom: 1px solid black; width: 10%; text-align: center;">3</td> <td style="border-bottom: 1px solid black; width: 10%; text-align: center;">4</td> <td style="border-bottom: 1px solid black; width: 10%; text-align: center;">5</td> <td style="border-bottom: 1px solid black; width: 10%; text-align: center;">6</td> <td style="border-bottom: 1px solid black; width: 10%; text-align: center;">7</td> <td style="border-bottom: 1px solid black; width: 10%; text-align: center;">8</td> <td style="border-bottom: 1px solid black; width: 10%; text-align: center;">9</td> <td style="border-bottom: 1px solid black; width: 10%; text-align: center;">10</td> </tr> <tr> <td style="text-align: center;">Totally<br/>unconvinced</td> <td></td> <td></td> <td style="text-align: center;">Unsure</td> <td></td> <td style="text-align: center;">Somewhat<br/>convinced</td> <td></td> <td style="text-align: center;">A lot</td> <td></td> <td></td> <td style="text-align: center;">Extremely<br/>convinced</td> </tr> </table> |                                                                                                                                      |                                                                                                                                | 0      | 1 | 2                     | 3 | 4     | 5 | 6 | 7                      | 8 | 9 | 10 | Totally<br>unconvinced |  |  | Unsure |  | Somewhat<br>convinced |  | A lot |  |  | Extremely<br>convinced |
| 0                                                                                                                                                                                                                                                                                                                                                                                                                                                                                                                                                                                                                                                                                                                                                                                                                                                                                                                                                                                                                                                                                                                                                                                                                                                                                                                                                                                 | 1                                                                                                                                    | 2                                                                                                                              | 3      | 4 | 5                     | 6 | 7     | 8 | 9 | 10                     |   |   |    |                        |  |  |        |  |                       |  |       |  |  |                        |
| Totally<br>unconvinced                                                                                                                                                                                                                                                                                                                                                                                                                                                                                                                                                                                                                                                                                                                                                                                                                                                                                                                                                                                                                                                                                                                                                                                                                                                                                                                                                            |                                                                                                                                      |                                                                                                                                | Unsure |   | Somewhat<br>convinced |   | A lot |   |   | Extremely<br>convinced |   |   |    |                        |  |  |        |  |                       |  |       |  |  |                        |
| <b>8. How convinced are you that this is the right goal for you?</b>                                                                                                                                                                                                                                                                                                                                                                                                                                                                                                                                                                                                                                                                                                                                                                                                                                                                                                                                                                                                                                                                                                                                                                                                                                                                                                              |                                                                                                                                      |                                                                                                                                |        |   |                       |   |       |   |   |                        |   |   |    |                        |  |  |        |  |                       |  |       |  |  |                        |
| <b>9. Solutions:</b><br><i>4) Identify safety issues</i><br><i>5) Test behavioral strategies to increase safety</i><br><i>6) Environmental solutions</i>                                                                                                                                                                                                                                                                                                                                                                                                                                                                                                                                                                                                                                                                                                                                                                                                                                                                                                                                                                                                                                                                                                                                                                                                                          |                                                                                                                                      |                                                                                                                                |        |   |                       |   |       |   |   |                        |   |   |    |                        |  |  |        |  |                       |  |       |  |  |                        |
| <b>10. Steps for Solution 1:</b><br><i>5) Evaluate safety issues during home visit</i><br><i>6) Identify possible safety issues with patient collaboration</i>                                                                                                                                                                                                                                                                                                                                                                                                                                                                                                                                                                                                                                                                                                                                                                                                                                                                                                                                                                                                                                                                                                                                                                                                                    | <b>Steps for Solution 2:</b><br><i>5) Stay in room when cooking</i><br><i>6) Explore impact of rushing and inattention on safety</i> | <b>Steps for Solution 3:</b><br><i>4) Explore equipment for bathroom (e.g., raised toilet seat with grab bars, bath bench)</i> |        |   |                       |   |       |   |   |                        |   |   |    |                        |  |  |        |  |                       |  |       |  |  |                        |
